# Supplementary material for: Association of Image-Guided Navigation With Complete Resection Rate in Patients With Locally Advanced Primary and Recurrent Rectal Cancer: A Nonrandomized Controlled Trial
Source: PubMed Central journal article supplement (PMC7344384; doi:10.1001/jamanetworkopen.2020.8522), 2020-07-08
Supplement: jamanetwopen-3-e208522-s002.pdf [file jamanetwopen-3-e208522-s002.pdf]

## Supplementary Online Content

Kok END, van Veen R, Groen HC, et al. Association of image-guided navigation with complete resection rate in patients with locally advanced primary and recurrent rectal cancer: a nonrandomized controlled trial. *JAMA Netw Open*. 2020;3(6):e208522. doi:10.1001/jamanetworkopen.2020.8522

**eFigure.** Mean Scores of Items in the System Usability Scale

This supplementary material has been provided by the authors to give readers additional information about their work.

eFigure. Mean Scores of Items in the System Usability Scale

For high usability, questions 1, 3, 5, 7, and 9 (dark gray) should be given higher scores, and questions 2, 4, 6, 8, and 10 (light gray) should be given lower scores. For each odd-numbered question, subtract 1 from the score; for each even-numbered question, subtract 5. Multiply the sum of the scores by 2.5 to obtain the overall score. In this study's questionnaire, the total score was 75 points.
